# Supplementary material
Source: PubMed Central journal article supplement (PMC7394890)

## Legend for supplementary figure

**Supplementary Figure 1. Structure-based sequence alignment of representative coronavirus nsp14. (A) sequence alignment of CoV nsp14 proteins.** PEDV nsp14 (gi: 557844763) and its homologs from *Alphacoronavirus* genus TGEV (gi: 110746821), *Betacoronavirus* genus SARS-CoV (gi: 40795428) and SARS-CoV-2 (gi: 1806553187), *Deltacoronavirus* genus PDCoV (gi: 668361756), and *Gammacoronavirus* genus IBV (gi: 9626535) were chosen for alignment by ClustalW2. Identical residues are shown in boxes with solid red background, and conserved residues are highlighted in red square. The catalytic residues D90, E92, D242, H267 and D272 of the ExoN domain are indicated with blue triangles. The SAM binding residue D330 of the G-N-7 MTase domain is marked with red triangle. The predicted secondary structure of PEDV nsp14 is displayed on the top. For the G-N-7 MTase domain, the secondary elements were labelled with new ranking number and followed the SAM-MT fold way. The figure was generated by ESPript Version3.0. **(B) Predicted tertiary structure of PEDV nsp14.** Ribbon representation of the tertiary structure of PEDV nsp14 generated with MODELLER 9.15 using SARS-CoV nsp14 (PDB ID: 5C8S) as template. Ribbon representation of the full-length PEDV nsp14. ExoN domain was shown in cyan color and G-N-7 MTase domain was shown in red color. The SAM binding motif was highlighted by yellow. **(C) Ribbon representation of the G-N-7 MTase domain of PEDV nsp14.** The N and C terminus are indicated. The amino acid residues (D330, G332, and D350) involved in the SAM binding was labeled.

Fig.S1

(A)

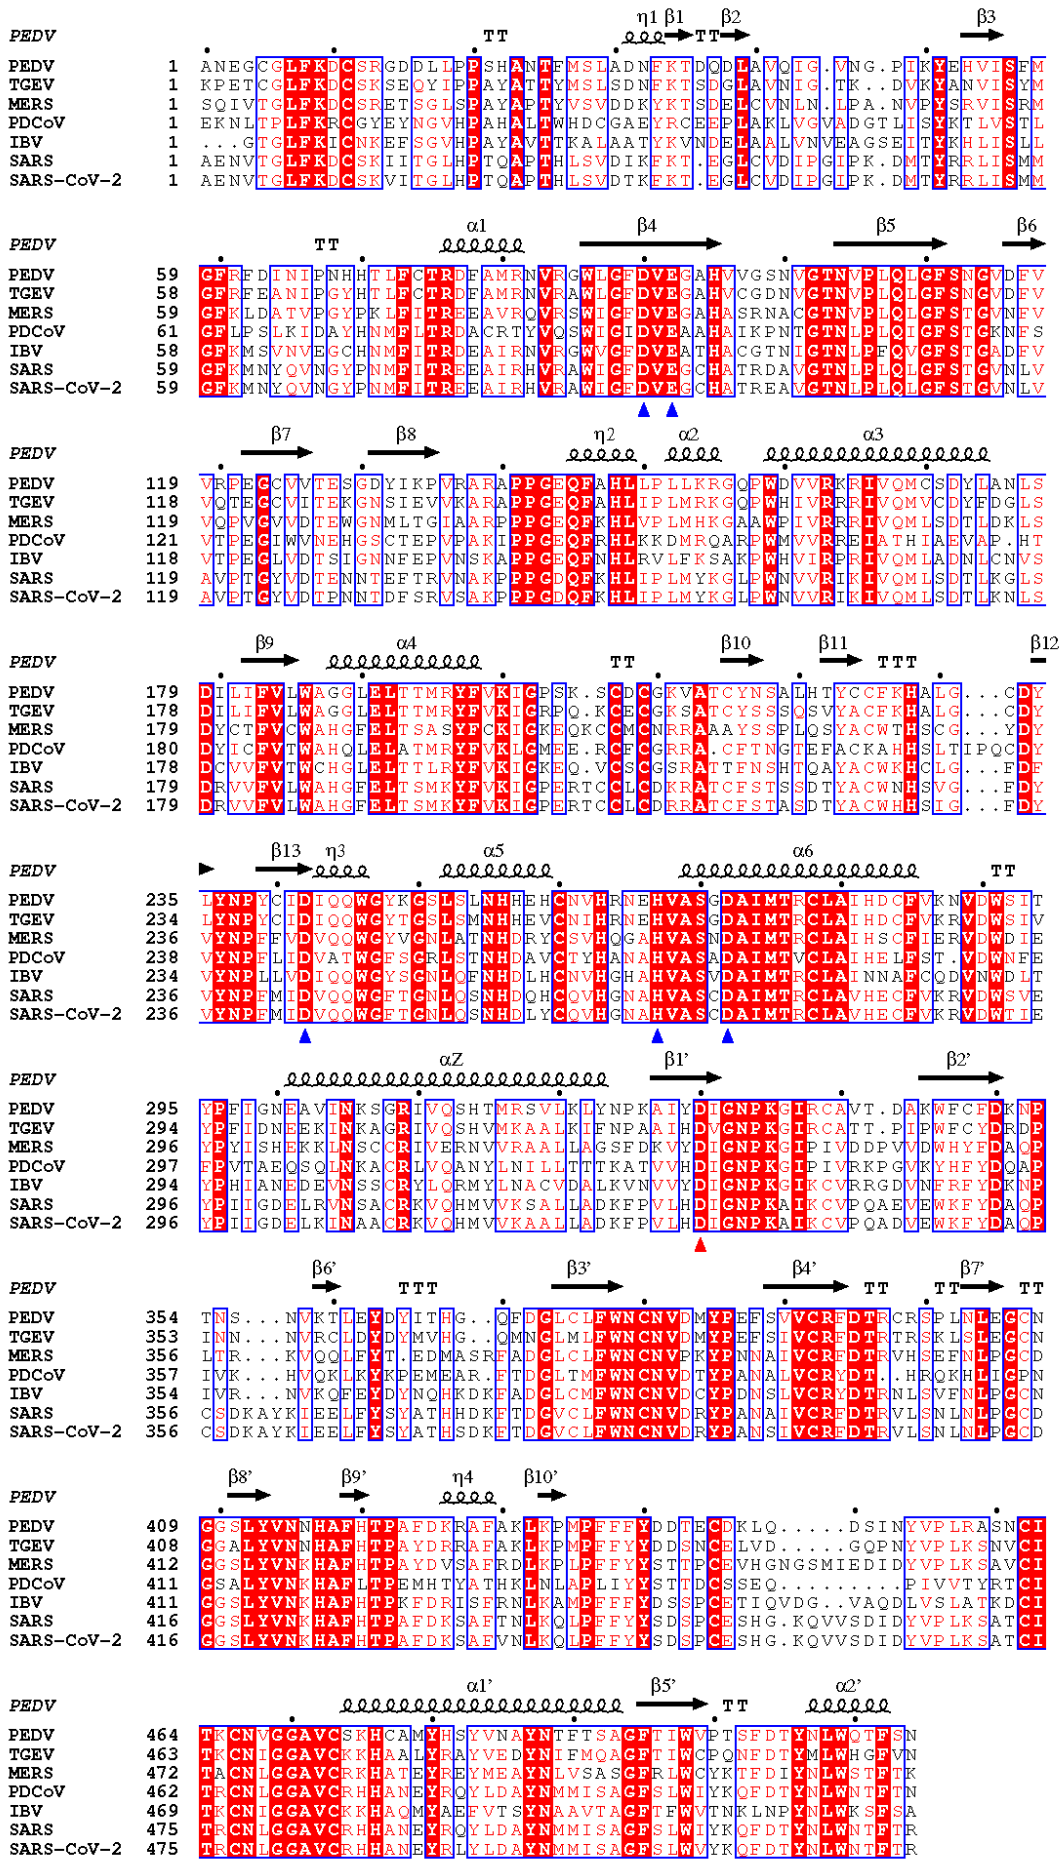

Fig.S1

(B)

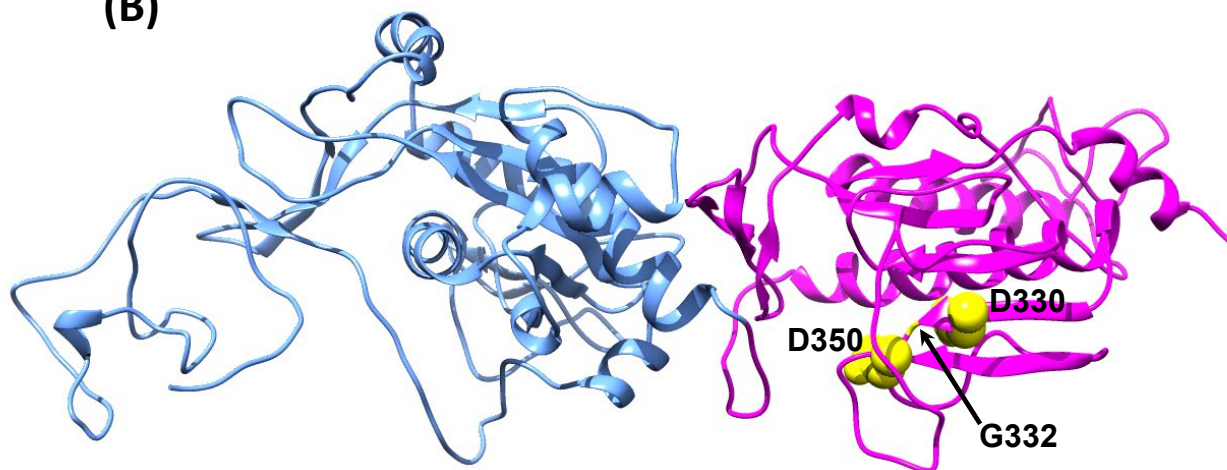

(C)

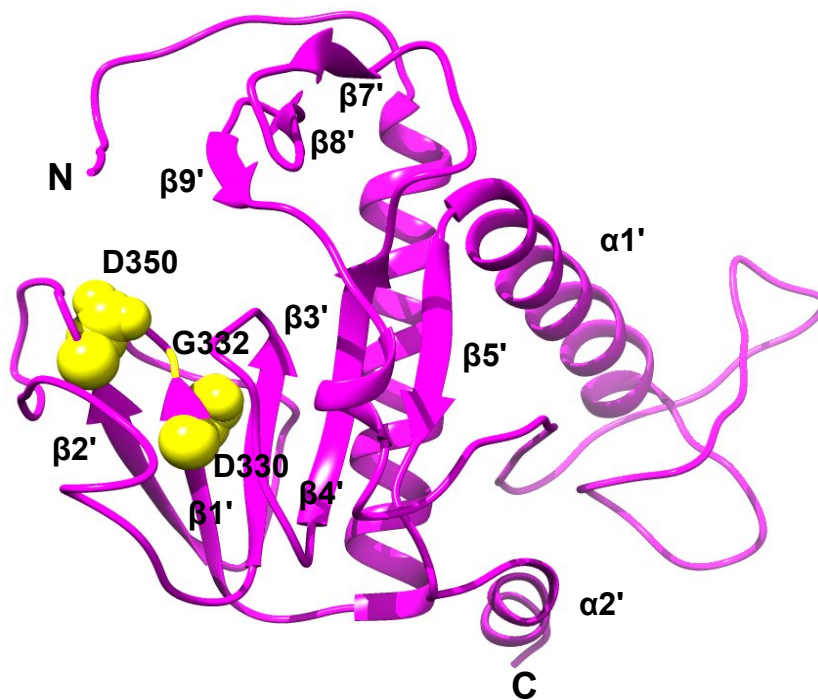

Supplement: JVI.00447-20-s0001.pdf [file JVI.00447-20-s0001.pdf]
